# Supplementary material for: An epigenetic memory of inflammation controls context-dependent lineage plasticity in the pancreas
Source: bioRxiv or medRxiv preprint supplement (doi:10.1101/2021.11.01.466807), 2022-04-06

## SUPPLEMENTARY FIGURE LEGENDS

**Figure S1. A,** Gene set enrichment analysis (GSEA) of RNA-seq data performed on tdTomato(+) acinar cells exposed to caerulein and 3 weeks of recovery versus tdTomato(+) acinar cells exposed to caerulein and 2 days of recovery. Top up- and down-regulated pathways are shown. **B,** PCA plot generated of the ATAC-seq data collected from tdTomato(+) acinar cells exposed to either saline or caerulein and allowed to recover for either 2 days or 3 weeks. Each point represents data obtained from a biological replicate mouse. **C,** Heatmap of ChromVar results characterizing the enrichment of known and *de novo* sequence transcription factor motifs in respective conditions. The top 75 motifs are shown. **D,** Venn diagram of motifs upregulated (green) and downregulated (red) in the corresponding contrasts.

**Figure S2. A,** Immunofluorescence for Sox9, TdTomato and DAPI staining of pancreas sections collected 2 days and 12 weeks after caerulein-induced pancreatitis. Representative images shown are from a total of N=2-5 mice per condition. **B,** Immunofluorescence for Cpa1, CK19 and DAPI staining of pancreas sections collected 2 days and 12 weeks after caerulein-induced pancreatitis. Representative images shown are from a total of N=2-5 mice per condition. **C,** UMAP projection of single-cell RNA-seq data generated with cells isolated from pancreata collected 2 days and 6 weeks after saline or caerulein treatment. **D,** Feature plots generated using single-cell RNA-seq data (subset on the epithelial compartment) for the indicated acinar/ductal/progenitor transcripts. **E,** Heatmap of single cell RNA-seq data on the epithelial compartment; Top 50 differentially expressed genes identified by comparing ductal versus acinar cell clusters ( $\log_2FC > 1$ ), wherein each column represents a single cell. **F,** Heatmap of all differentially expressed genes identified by comparing caerulein + 2d recovery and saline + 2d recovery ( $p_{adj} < 0.01$ ). **G,** Representative chromatin accessibility tracks at PanIN/duct/acinar genes visualized with IGV; light-blue boxes highlight chromatin dynamics that are up at 2 days and 3 weeks of recovery and lost with prolonged recovery; green boxes denote persistently accessible regions; dark-blue boxes represent regions that are lost and then regained with prolonged recovery. Scale bar for all tracks 0-60.

**Figure S3. A & C,** Schematic representations of primary pancreatitis and inflammatory re-challenge treatment regimen in wild-type mice. **B & D,** Hematoxylin and eosin staining of inflammation-naïve and inflammation-resolved mouse pancreas sections collected 2 days after inflammatory re-challenge. Representative images from a total of N=3-5 mice per condition (B) or images from all mice (D) are shown.

**Figure S4. A,** Schematic representation of lineage-traced mouse model exposed to primary treatment (saline or caerulein), 3 weeks of recovery, and then 3 weeks of mutant Kras activation. **B,** H&E and Alcian blue staining of mouse pancreas sections collected from mice previously exposed to either saline or caerulein plus 3 weeks of recovery, then 3 weeks of Kras<sup>G12D</sup>. Representative images shown are from a total of N=2-5 mice per condition. **C,** H&E staining of inflammation-naïve and inflammation-resolved lineage-traced mice, after 12 weeks of recovery and then 2 days of Kras<sup>G12D</sup>. **D & E,** Immunofluorescence for (D) Cpa1 and CK19 and (E) Dclk1 and DAPI staining of pancreas sections collected from inflammation-naïve and inflammation-resolved mice after 12 weeks of recovery and then 2 days of mutant Kras. **F,** GSEA of RNA-seq data comparing inflammation-naïve and inflammation-resolved tdTomato(+) acinar cells after 12 weeks of recovery and then 2 days of Kras<sup>G12D</sup>. **G,** Representative chromatin accessibility tracks at PanIN-specific genes visualized with IGV; light green boxes highlight persistently accessible regions.

**Figure S1**

**A**

**recovery 3 wks versus recovery 2 days**

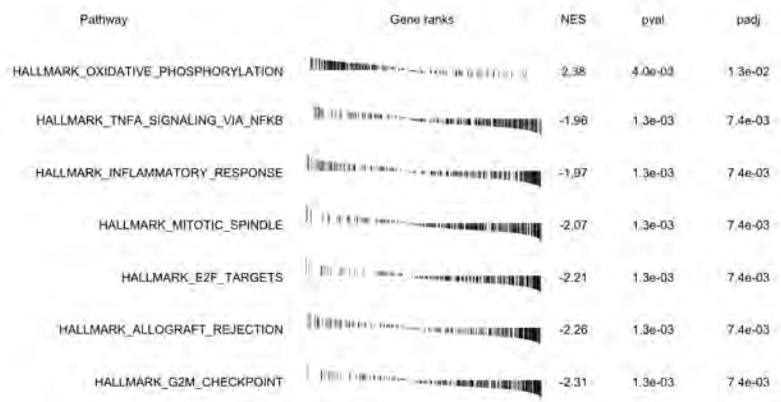

**recovery 2 days versus control**

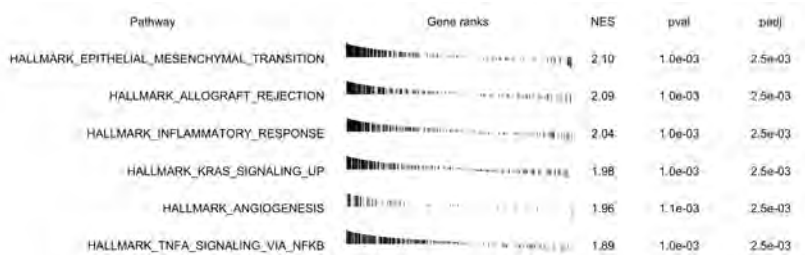

**B**

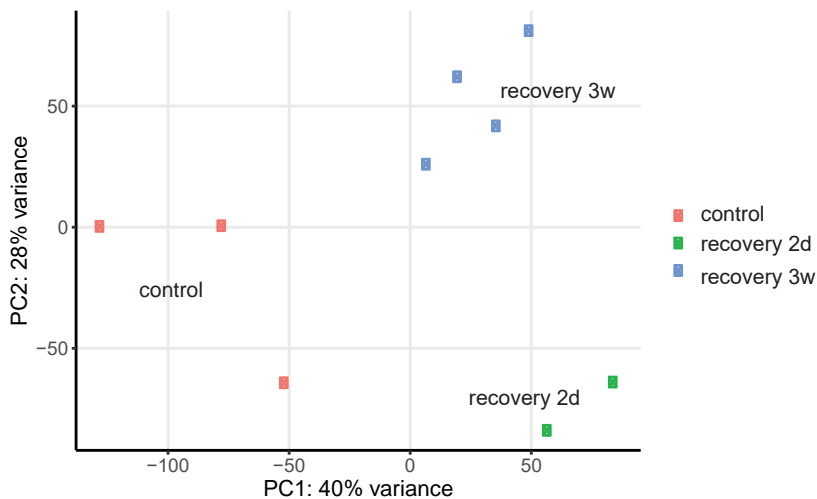

**C**

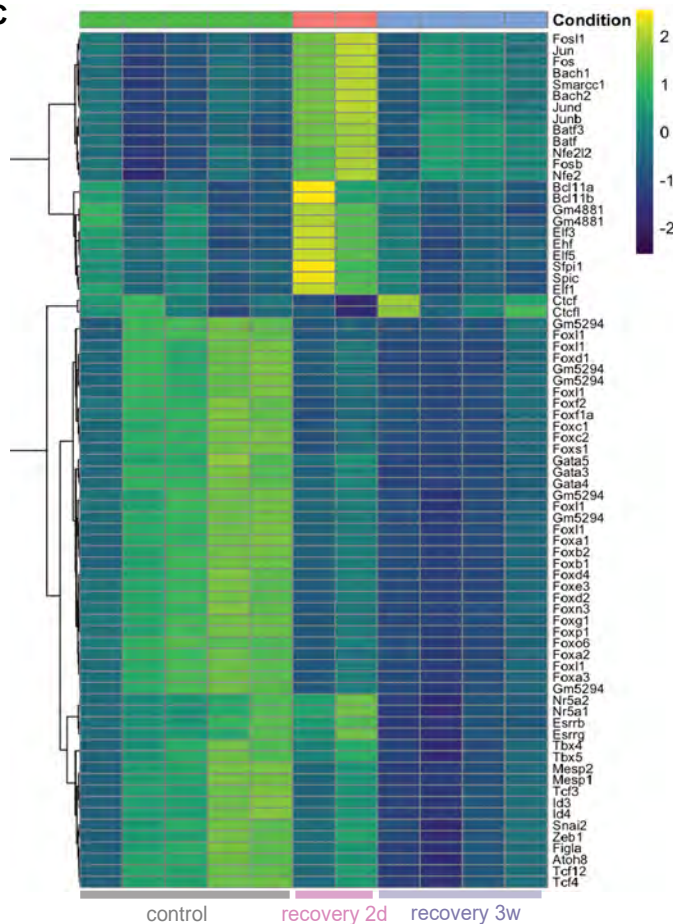

**D**

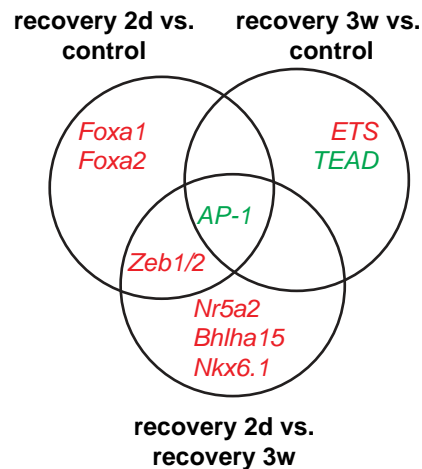





# Figure S3

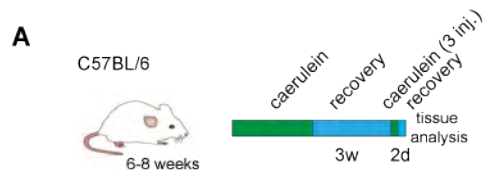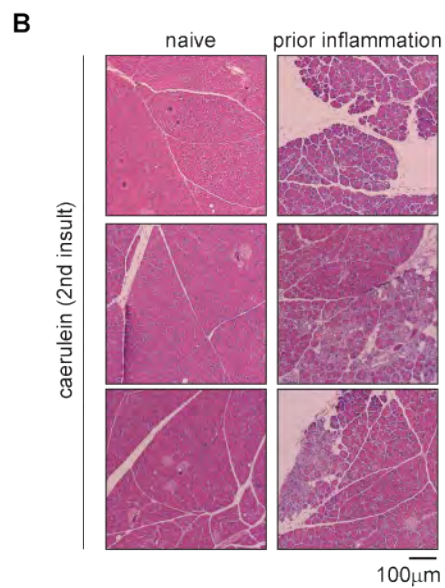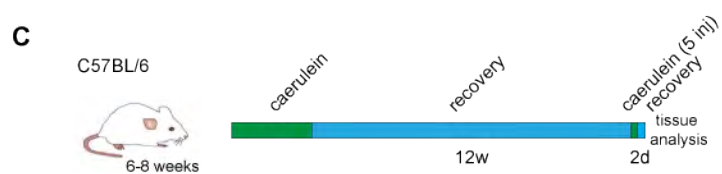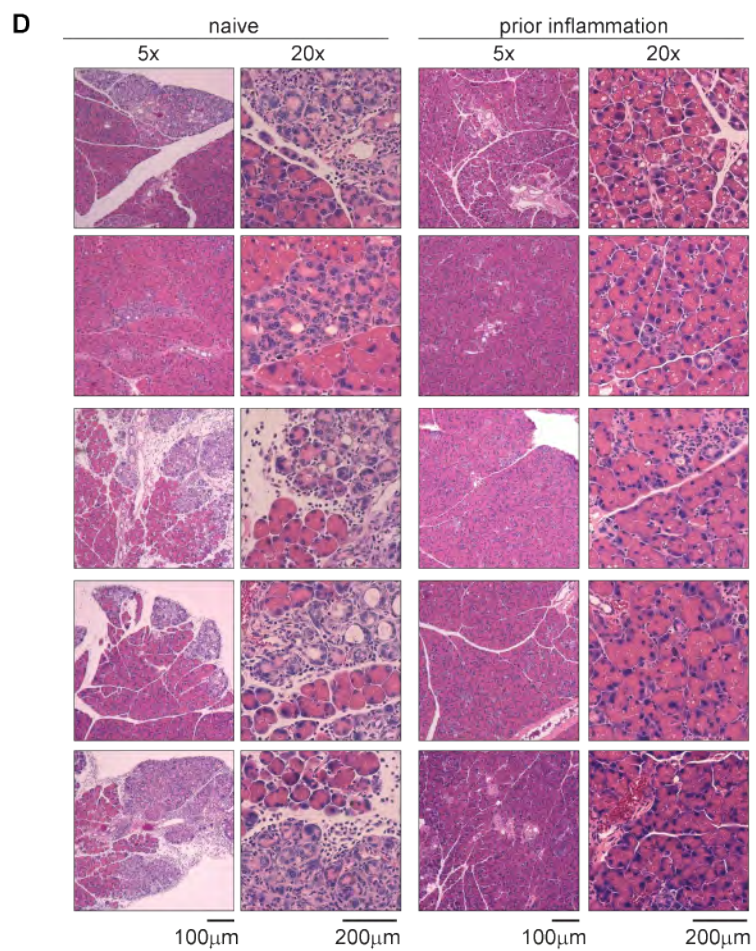

# Figure S4

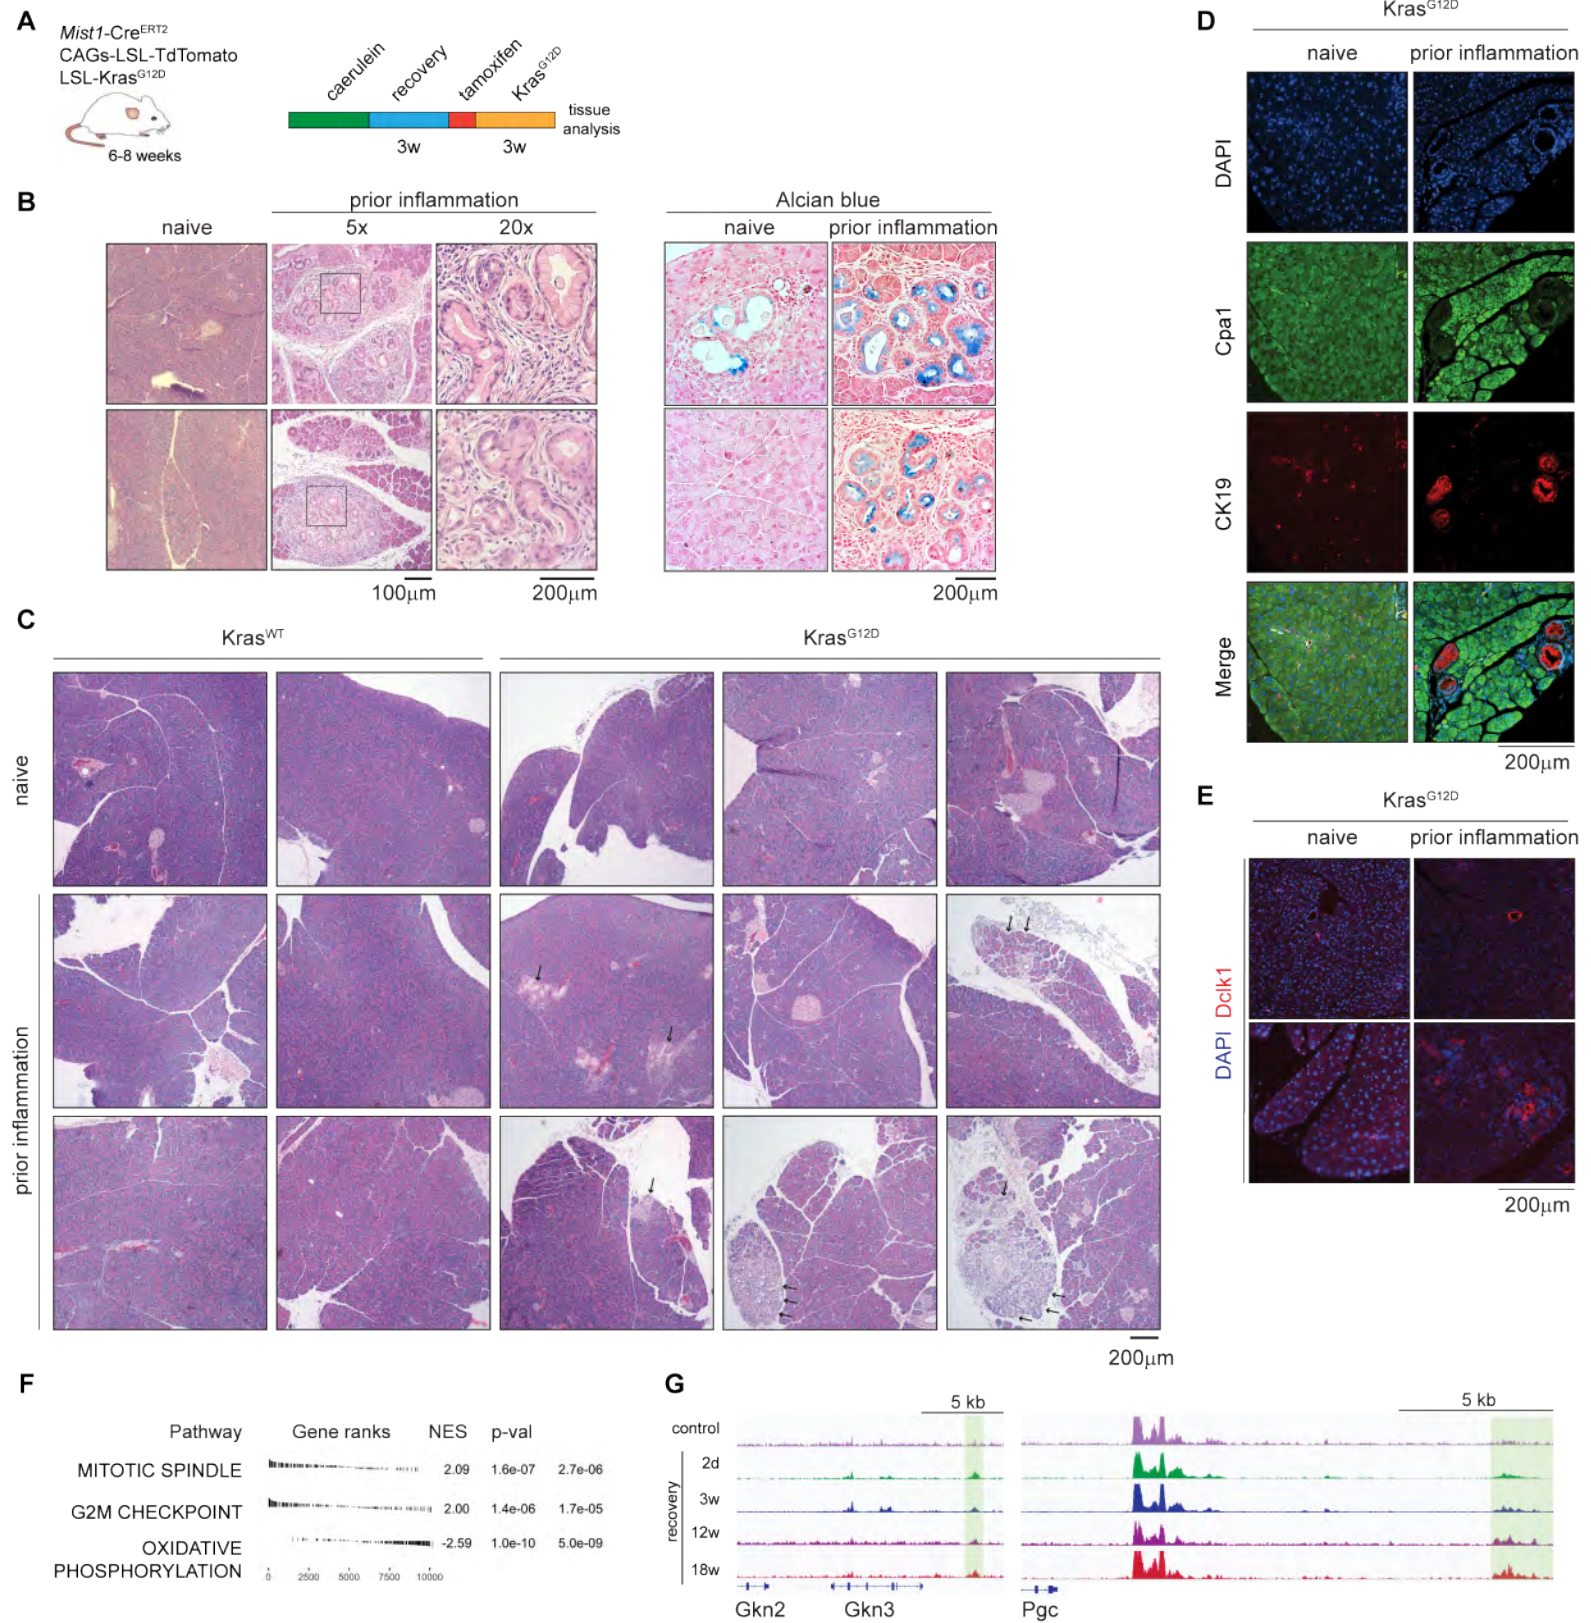

Supplement: Supplementary file [file media-1.pdf]
